# Supplementary material for: A Novel Fusion Protein System for the Production of Nanobodies and the SARS-CoV-2 Spike RBD in a Bacterial System
Source: MDPI journal article supplement (doi:10.3390/bioengineering10030389), 2023-03-22
Supplement: s1 [file s1]

## Supplementary Information

**DNA sequence with the ecotin fusion protein sequence (NdeI and XhoI restriction sites are highlighted):**

**cat atg** aag acg atc tta cct gct gtg ctt ttc gct gct ttt gca acg act agt gcc tgg gcc gca gaa tct gtt cag cct ctg gaa aaa  
atc gcg cct tat ccc cag gct gaa aag ggc atg aaa cgc caa gtc atc caa ctt acc ccg caa gag gat gaa tcg acc ttg aaa gtg  
gaa ctg tta atc ggg cag aca tta gag gtt gac tgc aac ctt cat cgt ctt ggc ggc aaa tta gag aac aag acc ttg gag gga tgg ggg  
tac gac tac tat gtg ttt gat aag gtc agt tct cca gtc tcg act atg atg gct tgc cct gat ggg aaa aag gag aag aag ttt gtt acc gcc  
tat tta ggc gac gct gga atg ctt cgc tac aac agt aag tta ccc atc gtg gtt tat acg ccc gat aat gtt gac gtt aaa tac cgc gtt tgg  
aag gca gaa gag aaa atc gac aat gcg gtt gtg cgc gga tca act agt ggt tct ggt cat cac cat cac cat tcc gcg ggt ctg gtg  
cca cgc gga tcc gaa ttc gag ctg cgt cga caa gct tgc ggc cgc **ctc gag**

**DNA sequence of the expressed nanobodies:**

Nb20:

ggt tct cag gtt cag ctg gtt gaa tct ggt ggt ggt ctg gtt cag gcg ggt ggt tct ctg cgt ctg tct tgc gcg gtt tct ggt gcg ggt gcg  
cac cgt gtt ggt tgg ttc cgt cgt gcg ccg ggt aaa gaa cgt gaa ttc gtt gcg gcg atc ggt gcg tct ggt ggt atg acc aac tac ctg  
gac tct gtt aaa ggt cgt ttc acc atc tct cgt gac aac gcg aaa aac acc atc tac ctg cag atg aac tct ctg aaa ccg cag gac acc  
gcg gtt tac tac tgc gcg gcg cgt gac atc gaa acc gcg gaa tac atc tac tgg ggt cag ggt acc cag gtt acc gtt tct tct

ab8:

gaa gtt cag ctg gtt gaa tct ggt ggt ggt ctg gtt cag ccg ggt ggt tct ctg cgt ctg tct tgc gcg gcg tct ggt ttc acc ttc gac gac  
tac gcg atg tct tgg gtt cgt cag gcg ccg ggt aaa ggt ctg gaa tgg atc ggt cgt atg tac aac aac ggt cgt acc tct tac aac ccg  
tct ctg aaa tct ctg gtt acc atc tct cgt gac aac tct aaa aac acc ctg tac ctg cag atg aac tct ctg cgt gcg gaa gac acc gcg  
acc tac tac tgc gcg cgt gac aac ctg ggt tac cgt ccg tct gaa aac ctg tac ggt atg gac gtt tgg ggt cag ggt acc acc gtt acc  
gtt tct tct

H11-H4:

cag gtt cag ctg gtt gaa tct ggt ggt ggt ctg atg cag gcg ggt ggt tct ctg cgt ctg tct tgc gcg gtt tct ggt cgt acc ttc tct acc  
gcg gcg atg ggt tgg ttc cgt cag gcg ccg ggt aaa gaa cgt gaa ttc gtt gcg gcg atc cgt tgg tct ggt ggt tct gcg tac tac gcg  
gac tct gtt aaa ggt cgt ttc acc atc tct cgt gac aaa gcg aaa aac acc gtt tac ctg cag atg aac tct ctg aaa tac gaa gac acc  
gcg gtt tac tac tgc gcg cag acc cac tac gtt tct tac ctg ctg tct gac tac gcg acc tgg ccg tac gac tac tgg ggt cag ggt acc  
cag gtt acc gtt tct tct

VHH72:

caa gtg caa tta caa gaa agt gga ggt gga ctg gtg caa gct ggt gga tca tta cgt ctg tcc tgc gcg gct tca ggc cgc act ttt agt  
gaa tat gcg atg ggt tgg ttc cgc cag gcc cca ggc aaa gaa cgt gaa ttt gta gca act att tcg tgg agt ggg ggt agc aca tac tat  
aca gat agc gta aaa gga cgc ttc act att tct cgc gat aac gcc aag aac act gta tat ctg cag atg aat agc ctg aag cca gat gac  
aca gca gtt tat tac tgt gct gcc gcg ggc ctg gga acg gtg gtc agc gaa tgg gat tac gat tat gat tac tgg ggt cag ggt act cag  
gtg act gtg agt agt ggc tcc

**DNA sequence of the full spike protein:**

atg ttc gtg ttt ctg gtg ctg ctg cct ctg gtg tcc agc cag tgt gtg aac ctg acc aca aga acc cag ctg cct cca gcc tac acc aac  
agc ttt acc aga ggc gtg tac tac ccc gac aag gtg ttc aga tcc agc gtg ctg cac tct acc cag gac ctg ttc ctg cct ttc ttc agc  
aac gtg acc tgg ttc cac gcc atc cac gtg tcc ggc acc aat ggc acc aag aga ttc gac aac ccc gtg ctg ccc ttc aac gac ggg  
gtg tac ttt gcc agc acc gag aag tcc aac atc atc aga ggc tgg atc ttc ggc acc aca ctg gac agc aag acc cag agc ctg ctg  
atc gtg aac aac gcc acc aac gtg gtc atc aaa gtg tgc gag ttc cag ttc tgc aac gac ccc ttc ctg ggc gtc tac tat cac aag aac  
aac aag agc tgg atg gaa agc gag ttc ccg gtg tac agc agc gcc aac aac tgc acc ttc gag tac gtg tcc cag cct ttc ctg atg  
gac ctg gaa ggc aag cag ggc aac ttc aag aac ctg cgc gag ttc gtg ttc aag aac atc gac ggc tac ttc aag atc tac agc aag  
cac acc cct atc aac ctc gtg cgg gat ctg cct cag ggc ttc tct gct ctg gaa ccc ctg gtg gat ctg ccc atc ggc atc aac atc acc  
cgg ttt cag aca ctg ctg gcc ctg cac aga agc tac ctg aca cct ggc gat agc agc agc gga tgg aca gct ggt gcc gcc gct tac

tat gtg ggc tac ctg cag cct aga acc ttt ctg ctg aag tac aac gag aac ggc acc atc acc gac gcc gtg gat tgt gct ctg gat cct  
ctg agc gag aca aag tgc acc ctg aag tcc ttc acc gtg gaa aag ggc atc tac cag acc agc aac ttc cgg gtg cag ccc acc gaa  
tcc atc gtg cgg ttc ccc aat atc acc aat ctg tgc ccc ttc ggc gag gtg ttc aat gcc acc aga ttc gcc tct gtg tac gcc tgg aac  
cgg aag cgg atc agc aat tgc gtg gcc gac tac tcc gtg ctg tac aac tcc gcc agc ttc agc acc ttc aag tgc tac ggc gtg tcc cct  
acc aag ctg aac gac ctg tgc ttc aca aac gtg tac gcc gac agc ttc gtg atc cgg gga gat gaa gtg cgg cag att gcc cct gga  
cag aca ggc aag atc gcc gac tac aac tac aag ctg ccc gac gac ttc acc ggc tgt gtg att gcc tgg aac agc aac aac ctg gac  
tcc aaa gtc ggc ggc aac tac aat tac ctg tac cgg ctg ttc cgg aag tcc aat ctg aag ccc ttc gag cgg gac atc tcc acc gag atc  
tat cag gcc ggc agc acc cct tgt aac ggc gtg gaa ggc ttc aac tgc tac ttc cca ctg cag tcc tac ggc ttt cag ccc aca aat ggc  
gtg ggc tat cag ccc tac aga gtg gtg gtg ctg agc ttc gaa ctg ctg cat gcc cct gcc aca gtg tgc ggc cct aag aaa agc acc  
aat ctg gtg aag aac aaa tgc gtg aac ttc aac ttc aac ggc ctg acc ggc acc ggc gtg ctg aca gag agc aac aag aag ttc ctg  
cca ttc cag cag ttt ggc cgg gat atc gcc gat acc aca gac gcc gtt aga gat ccc cag aca ctg gaa atc ctg gac atc acc cct tgc  
agc ttc ggc gga gtg tct gtg atc acc cct ggc acc aac acc agc aat cag gtg gca gtg ctg tac cag gac gtg aac tgt acc gaa  
gtg ccc gtg gcc att cac gcc gat cag ctg aca cct aca tgg cgg gtg tac tcc acc ggc agc aat gtg ttt cag acc aga gcc ggc  
tgt ctg atc gga gcc gag cac gtg aac aat agc tac gag tgc gac atc ccc atc ggc gct ggc atc tgt gcc agc tac cag aca cag  
aca aac agc ccc gcc tct gtg gcc agc cag agc atc att gcc tac aca atg tct ctg ggc gcc gag aac agc gtg gcc tac tcc aac  
aac tct atc gct atc ccc acc aac ttc acc atc agc gtg acc aca gag atc ctg cct gtg tcc atg acc aag acc agc gtg gac tgc acc  
atg tac atc tgc ggc gat tcc acc gag tgc tcc aac ctg ctg ctg cag tac ggc agc ttc tgc acc cag ctg aat aga gcc ctg aca ggg  
atc gcc gtg gaa cag gac aag aac acc caa gag gtg ttc gcc caa gtg aag cag atc tac aag acc cct cct atc aag gac ttc ggc  
ggc ttc aat ttc agc cag att ctg ccc gat cct agc aag ccc agc aag cgg agc ttc atc gag gac ctg ctg ttc aac aaa gtg aca ctg  
gcc gac gcc ggc ttc atc aag cag tat ggc gat tgt ctg ggc gac att gcc gcc agg gat ctg att tgc gcc cag aag ttt aac gga ctg  
aca gtg ctg cct cct ctg ctg acc gat gag atg atc gcc cag tac aca tct gcc ctg ctg gcc ggc aca atc aca agc ggc tgg aca ttt  
gga gct ggc gcc gct ctg cag atc ccc ttt gct atg cag atg gcc tac cgg ttc aac ggc atc gga gtg acc cag aat gtg ctg tac gag  
aac cag aag ctg atc gcc aac cag ttc aac agc gcc atc ggc aag atc cag gac agc ctg agc agc aca gca agc gcc ctg gga aag  
ctg cag gac gtg gtc aac cag aat gcc cag gca ctg aac acc ctg gtc aag cag ctg tcc tcc aac ttc ggc gcc atc agc tct gtg  
ctg aac gat atc ctg agc aga ctg gac cct cct gaa gcc gag gtg cag atc gac aga ctg atc acc gga agg ctg cag tcc ctg cag  
acc tac gtt acc cag cag ctg atc aga gcc gcc gag att aga gcc tct gcc aat ctg gcc gcc acc aag atg tct gag tgt gtg ctg ggc  
cag agc aag aga gtg gac ttt tgc ggc aag ggc tac cac ctg atg agc ttc cct cag tct gcc cct cac ggc gtg gtg ttt ctg cac gtg  
aca tac gtg ccc gct caa gag aag aat ttc acc acc gct cca gcc atc tgc cac gac ggc aaa gcc cac ttt cct aga gaa ggc gtg  
ttc gtg tcc aac ggc acc cat tgg ttc gtg acc cag cgg aac ttc tac gag ccc cag atc atc acc acc gac aac acc ttc gtg tct ggc  
aac tgc gac gtc gtg atc ggc att gtg aac aat acc gtg tac gac cct ctg cag ccc gag ctg gac agc ttc aaa gag gaa ctg gat  
aag tac ttt aag aac cac aca agc ccc gac gtg gac ctg ggc gat atc agc gga atc aat gcc agc gtc gtg aac atc cag aaa gag  
atc gac cgg ctg aac gag gtg gcc aag aat ctg aac gag agc ctg atc gac ctg caa gaa ctg ggg aag tac gag cag tac atc aag  
tgg ccc

#### **Amino acid sequence of the ecotin fusion protein:**

MKTILPAVLFAAFATTSAAWAAESVQPLEKIAPYPQAEKGMKRQVIQLTPQEDESTLKVELLIGQTLEVD  
CNLHRLGGKLENKTLEGWGYDYVFDKVSSPVSTMMACPDGKKEKKFVTAYLGDAGMLRYSNKLPI  
VVYTPDNVDVKYRVWKAEEKIDNAVVRGSTSGSGHHHHHSAGLVPR|GS

#### **Amino acid sequence of the expressed nanobodies (residual amino acids from the cleaving are underlined):**

Nb20:

GSQVQLVESGGGLVQAGGSLRLSCAVSGAGAHRVGWFRRAPGKEREFVAAIGASGGMTNYLDSVKG  
RFTISRDNANKNTIYLQMNSLKPQDTAVYYCAARDIETAEYIYWGGTQVTVSS

ab8:

GSQVQLVESGGGLVQPGGSLRLSCAASGFTFDDYAMSWVRQAPGKGLEWIGRMYNNGRTSYNPSLKS  
LVTISRDNANKNTLYLQMNSLRAEDTATYYCARDNLGYRPSNLYGMDVWGGTQVTVSS

H11-H4:

GSQVQLVESGGGLMQAGGSLRLSCAVSGRTFSTAAMGWFRQAPGKEREFVAAIRWSGGSAYYADSV  
KGRFTISRDKAKNTVYLMNSLKYEDTAVYYCAQTHYVSYLLSDYATWPYDYWGQGTQVTVSS

VHH72:

MDQVQLQESGGGLVQAGGSLRLSCAASGRTFSEYAMGWFRQAPGKEREFVATISWSGGSTYYTDSVK  
GRFTISRDNANKNTVYLMNSLKPDDTAVYYCAAAGLGTVVSEWDYDYDYWGQGTQVTVSS

#### **Nanobody expression trials under different conditions:**

**Table S1.** VHH72

| Number of trials | Nutrition solution | Bacterial strain  | Signal seq. | Prom. | Fusion protein | Expression compartment | Temp. (°C) | Yield (mg/L) |
|------------------|--------------------|-------------------|-------------|-------|----------------|------------------------|------------|--------------|
| 1.               | Auto induction     | <i>BL21 (DE3)</i> | -           | T7    | -              | periplasm              | 18         | 0.17         |
| 2.               | 2YT                | <i>BL21 (DE3)</i> | -           | T7    | -              | periplasm              | 18         | 0            |
| 3.               | 2YT                | <i>Shuffle-T7</i> | -           | T7    | -              | periplasm              | 18         | 0            |
| 4.               | 2YT                | <i>Shuffle-T7</i> | pelB        | T7    | -              | periplasm              | 18         | 0.1          |
| 5.               | 2YT                | <i>BL21 (DE3)</i> | -           | T7    | MBP            | cytoplasm              | 18         | 0            |
| 6.               | 2YT                | <i>Shuffle-T7</i> | -           | T7    | MBP            | cytoplasm              | 18         | 0            |
| 7.               | 2YT                | <i>BL21 (DE3)</i> | -           | Tac   | GST            | cytoplasm              | 18         | 0            |
| 8.               | 2YT                | <i>Shuffle-T7</i> | -           | Tac   | GST            | cytoplasm              | 18         | 0            |
| 9.               | Auto induction     | <i>BL21 (DE3)</i> | -           | T7    | -              | cytoplasm, periplasm   | 23         | 0            |
| 10.              | Auto induction     | <i>BL21 (DE3)</i> | -           | T7    | -              | cytoplasm, periplasm   | 30         | 0            |
| 11.              | Auto induction     | <i>HB2151</i>     | -           | T7    | -              | cytoplasm, periplasm   | 30         | 0            |

**Table S2.** Nb20

| Number of trials | Nutrition solution | Bacterial strain  | Signal seq. | Prom. | Fusion protein | Expression compartment | Temp. (°C) | Yield (mg/L) |
|------------------|--------------------|-------------------|-------------|-------|----------------|------------------------|------------|--------------|
| 1.               | 2YT                | <i>Shuffle-T7</i> | -           | T7    | -              | cytoplasm              | 18         | 0            |
| 2.               | 2YT                | <i>BL21 (DE3)</i> | -           | T7    | -              | cytoplasm              | 18         | 0            |

**Table S3.** ab8

| Number of trials | Nutrition solution | Bacterial strain | Signal seq. | Prom. | Fusion protein | Expression compartment | Temp. (°C) | Yield (mg/L) |
|------------------|--------------------|------------------|-------------|-------|----------------|------------------------|------------|--------------|
| 1.               | Auto induction     | <i>HB2151</i>    | -           | T7    | -              | cytoplasm, periplasm   | 30         | 0            |
| 2.               | 2YT                | <i>HB2151</i>    | -           | T7    | -              | cytoplasm, periplasm   | 30         | 0            |

**Supplemental Figures:**

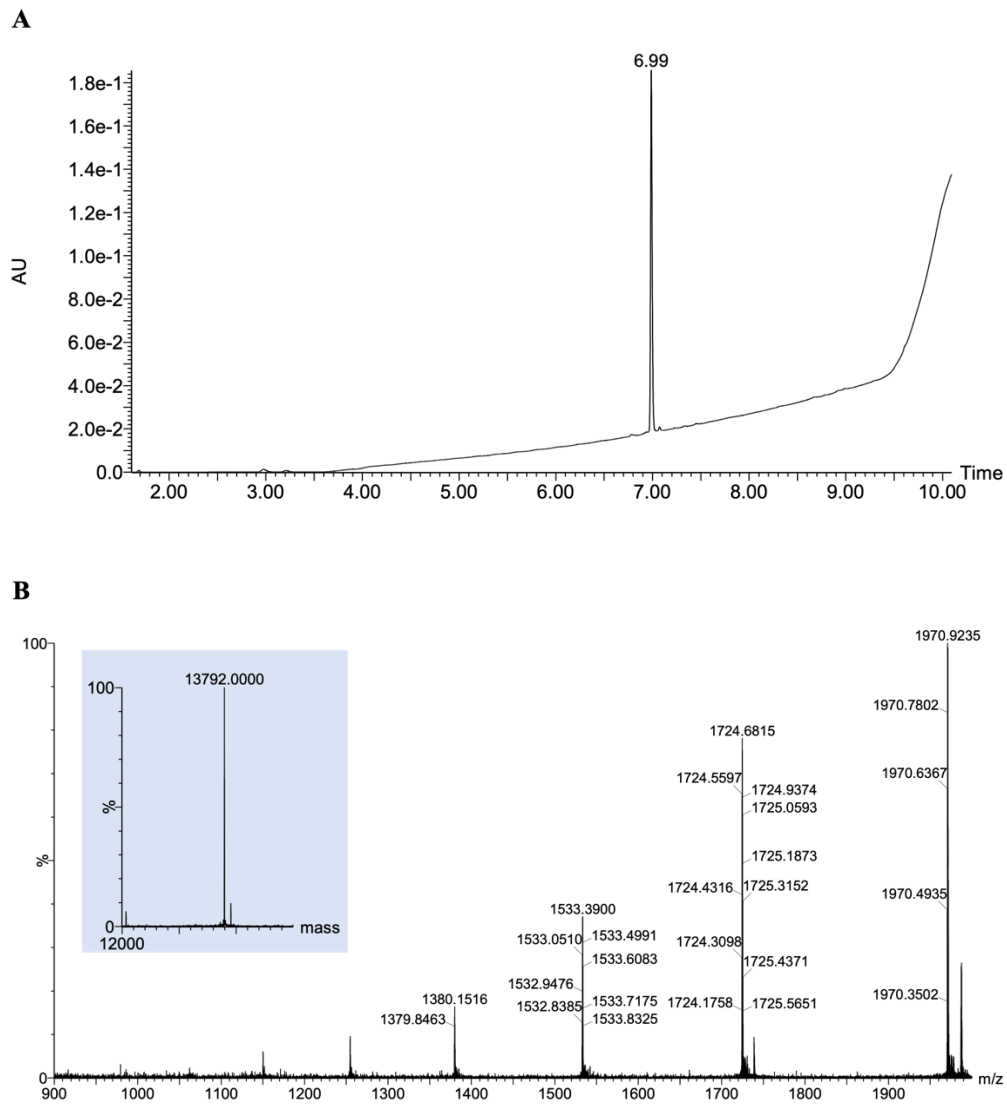

**Figure S1. A)** HPLC chromatogram ( $A_{220\text{nm}}$ ) of the expressed ab8 nanobody. **B)** Mass spectrum and deconvoluted spectrum of the peak  $R_t=6.99$  min.

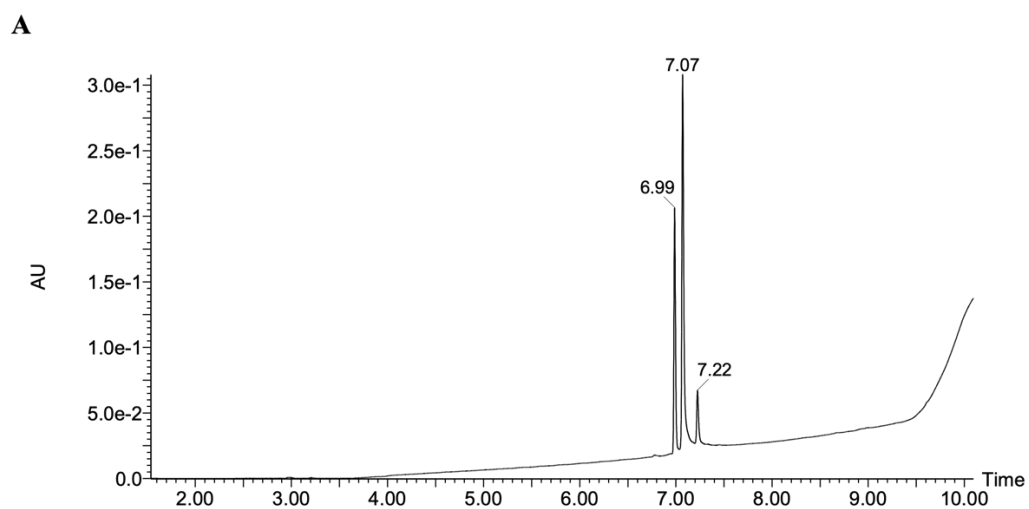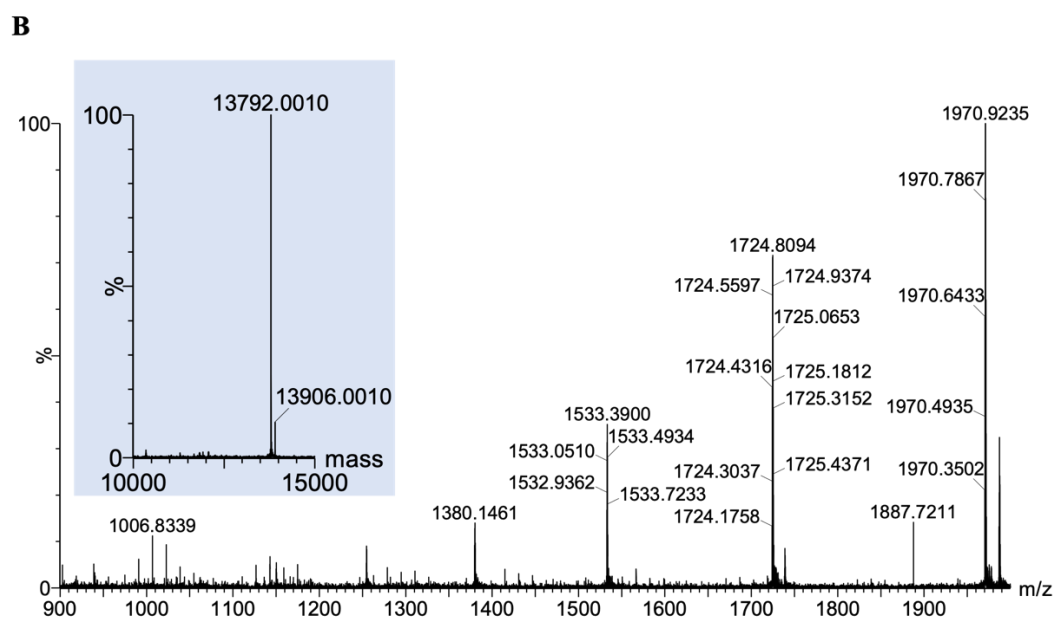

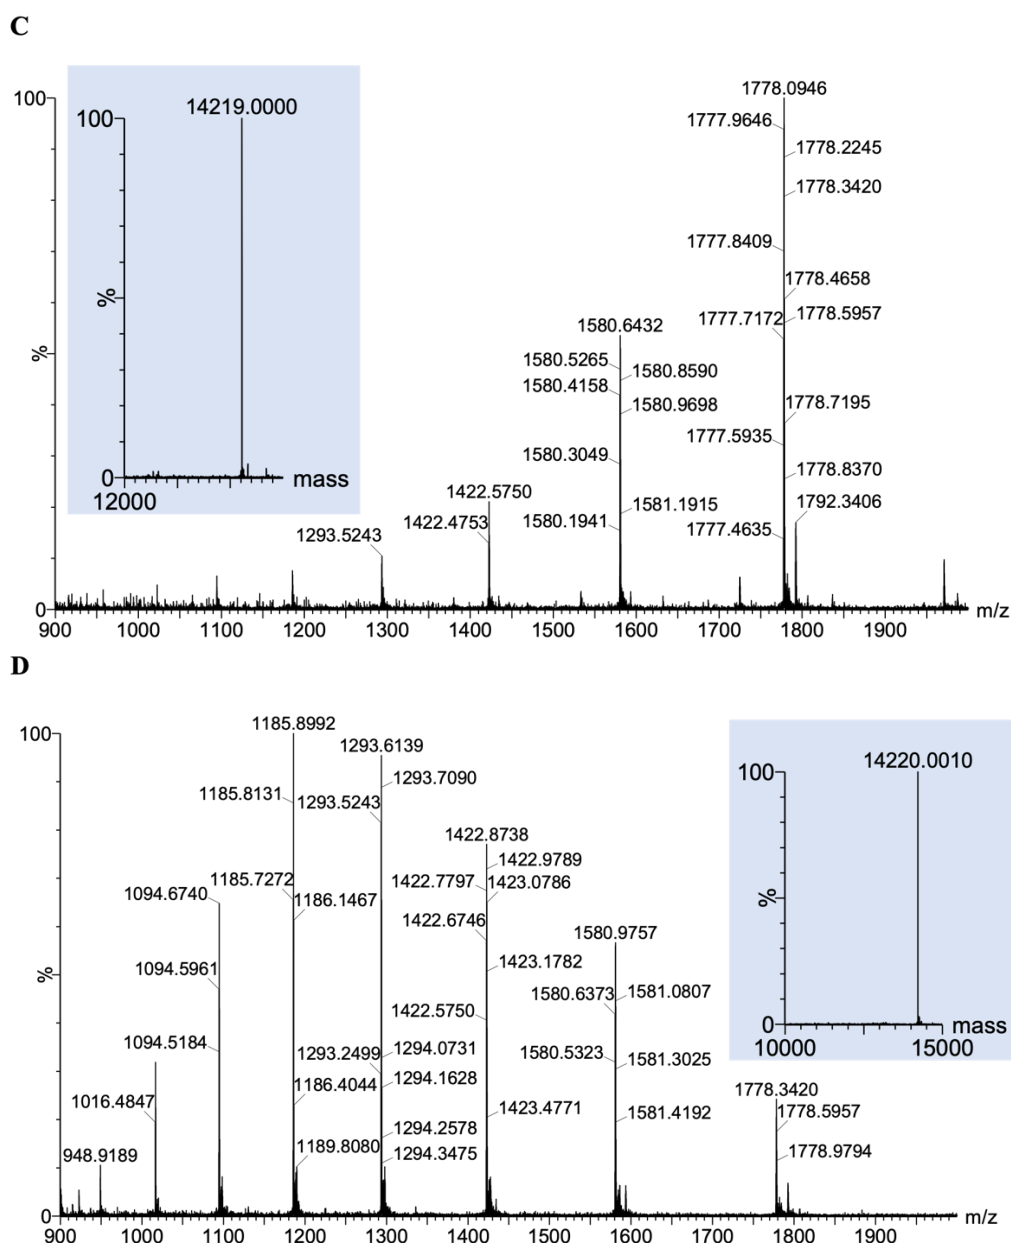

**Figure S2.** **A)** HPLC chromatogram ( $A_{220\text{nm}}$ ) of the expressed H11-H4 nanobody. **B)** Mass spectrum and deconvoluted spectrum of the peak  $R_t=6.99$  min. **C)** Mass spectrum and deconvoluted spectrum of the peak  $R_t=7.07$  min. **D)** Mass spectrum and deconvoluted spectrum of the peak  $R_t=7.22$  min.

**A**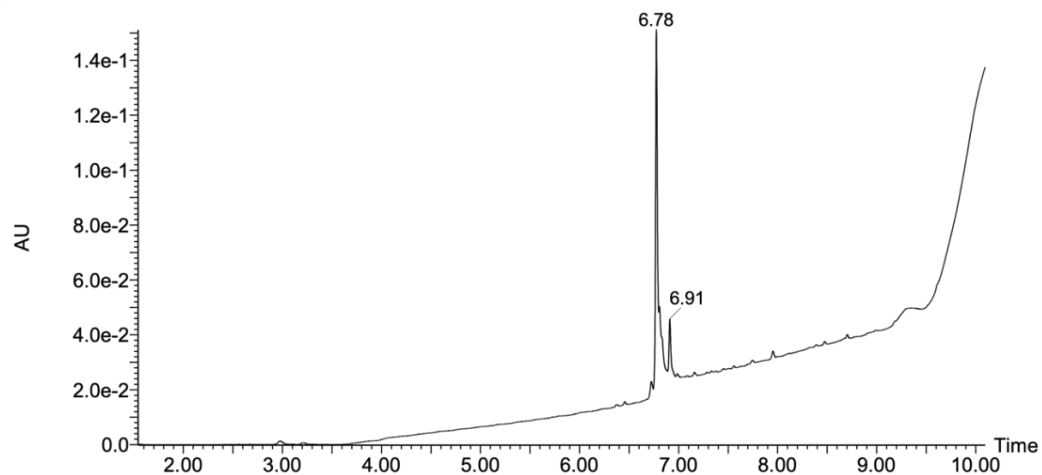**B**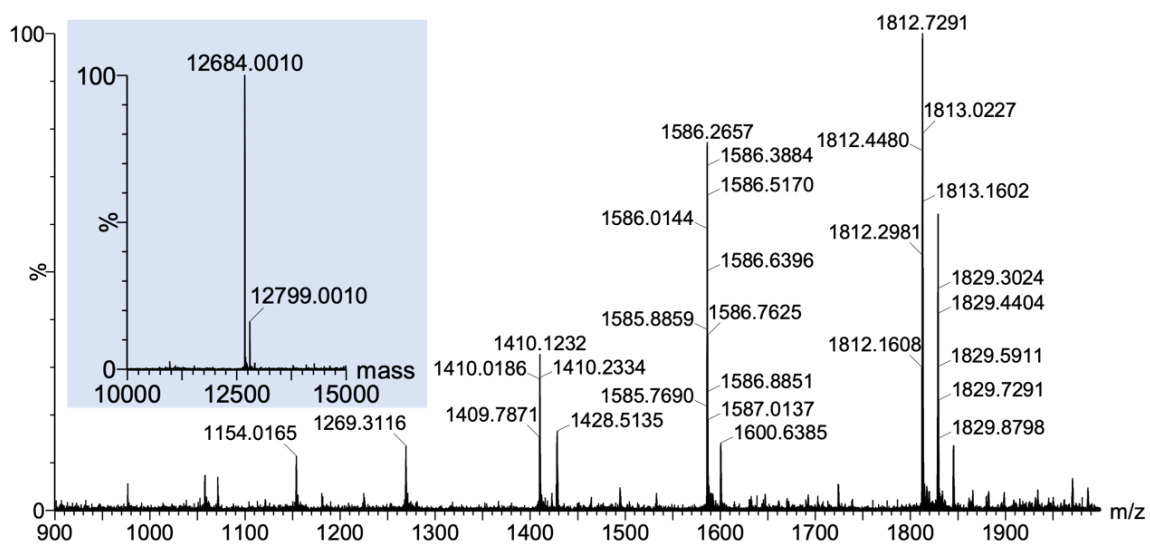

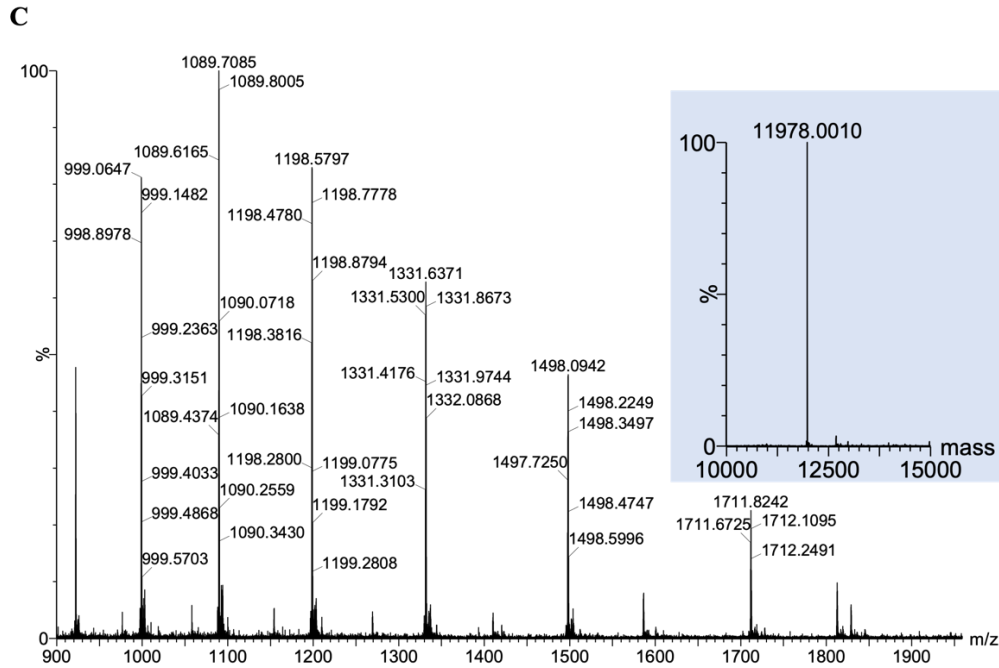

**Figure S3.** A) HPLC chromatogram ( $A_{220\text{nm}}$ ) of the expressed Nb20 nanobody. B) Mass spectrum and deconvoluted spectrum of the peak Rt=6.78 min. C) Mass spectrum and deconvoluted spectrum of the peak Rt=6.91 min.

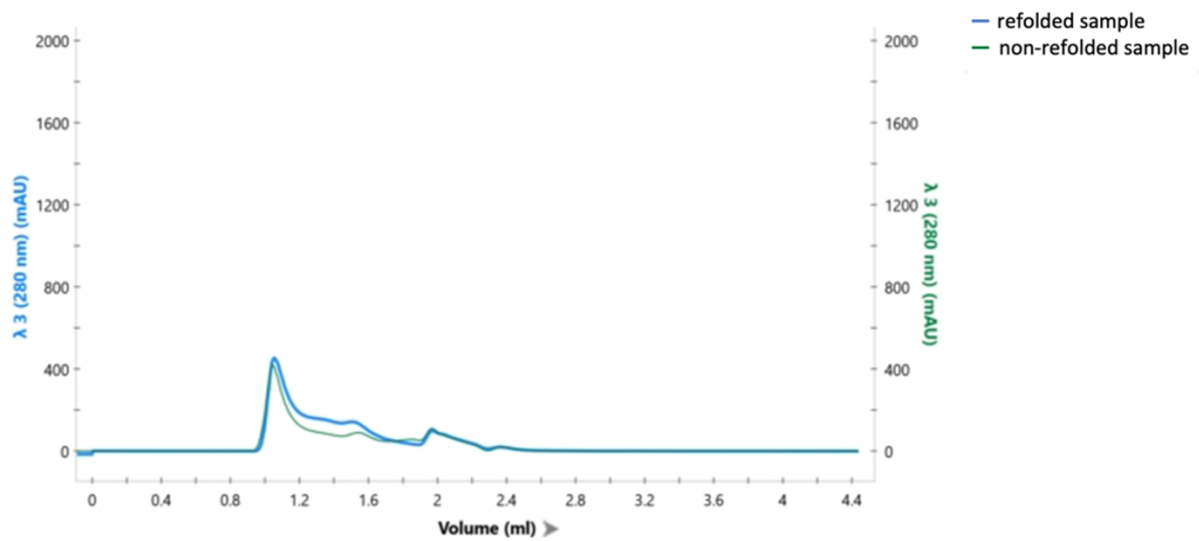

**Figure S4.** Comparison of chromatograms from the size-exclusion chromatography of refolded (blue) and non-refolded (green) spike RBD delta variants.



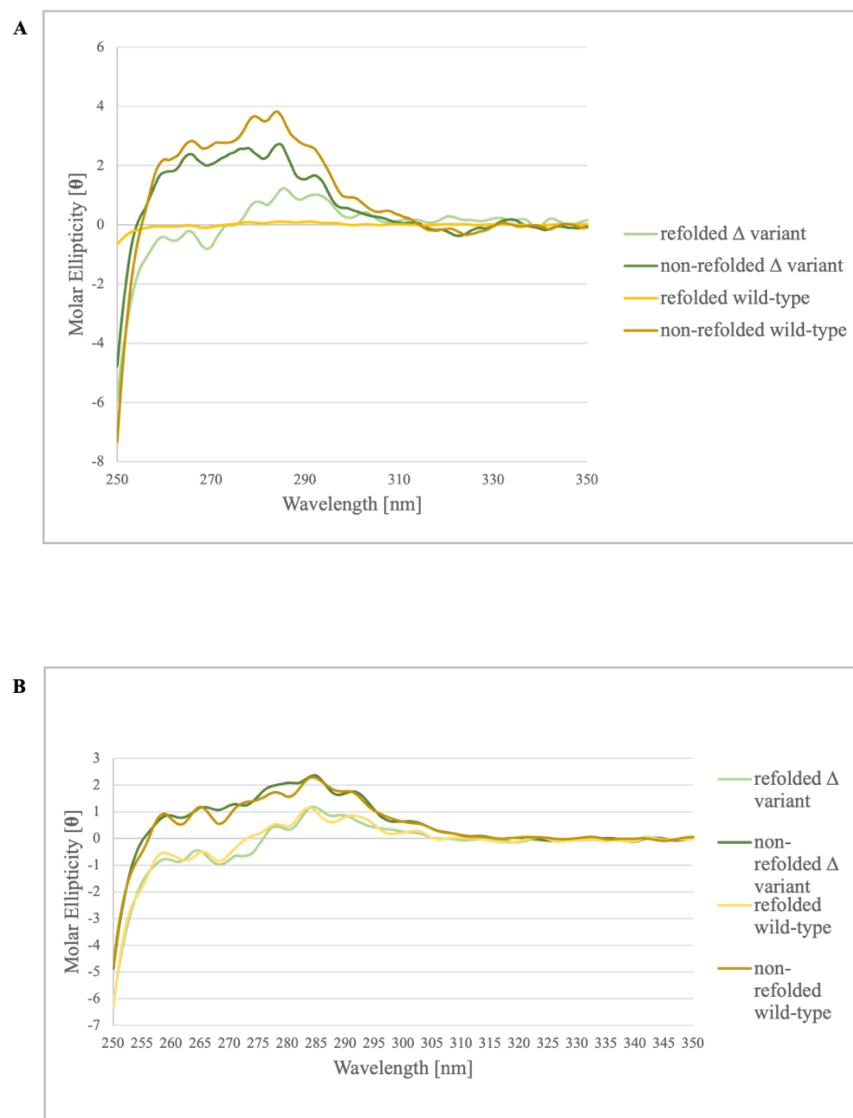

**Figure S5.** Comparison of spike RBD delta and wild-type variants after a refolded and non-refolded purification process by NUV-ECD measurements at **A)** 8 $\mu$ M and **B)** 16  $\mu$ M concentrations.

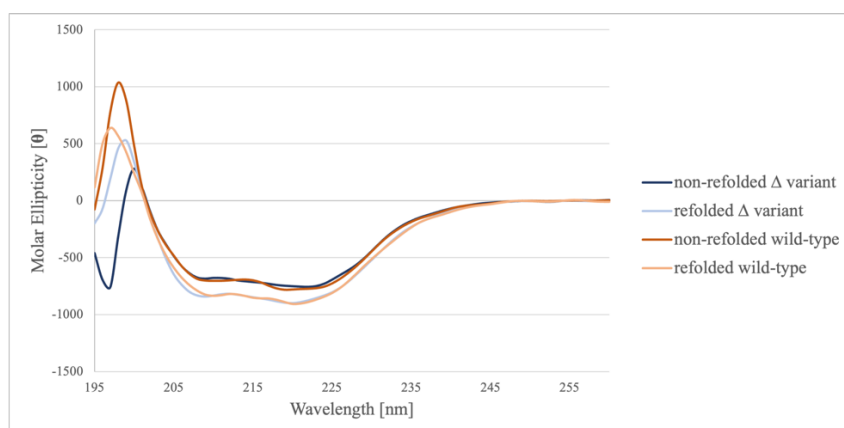

**Figure S6.** Comparison of spike RBD delta and wild-type variants after a refolded and non-refolded purification process by FUV-ECD measurements at a concentration of 16  $\mu$ M.

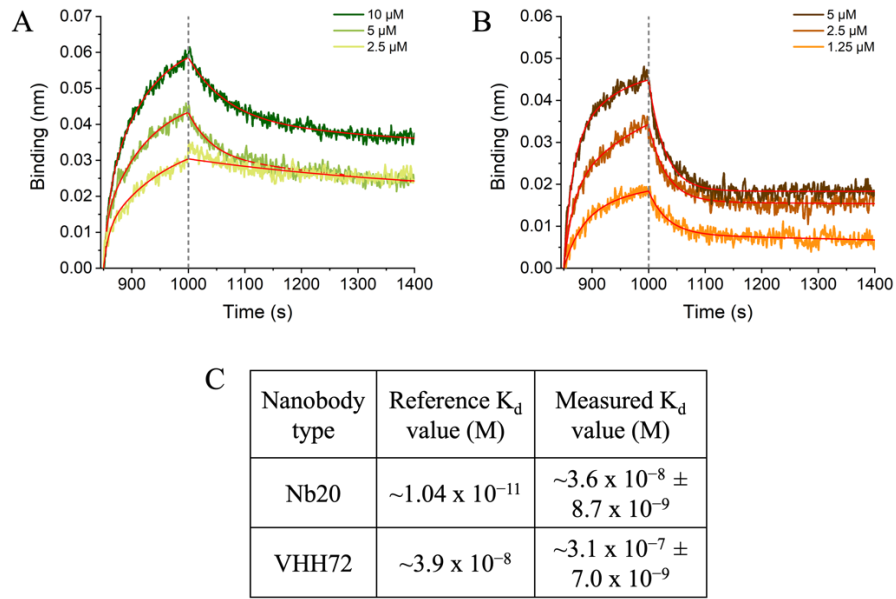

**Figure S7.** Binding of **A)** VHH72 and **B)** Nb20 anti-spike antibody variants to the receptor-binding domain of the spike protein fused to the maltose-binding protein at different concentrations. Table **C** contains the collected reference [18,20] and measured  $K_d$  values.
